# Supplementary material for: Cytoprotective Activity of Polyamines Is Associated with the Alternative Splicing of RAD51A Pre-mRNA in Normal Human CD4+ T Lymphocytes
Source: MDPI journal article supplement (doi:10.3390/ijms23031863), 2022-02-07
Supplement: s1 [file s1]

# **Cytoprotective Activity of Polyamines is Associated with the Alternative Splicing of RAD51A Pre-mRNA in Normal Human CD4<sup>+</sup> T Lymphocytes**

**Yulia A. Gladilina<sup>1</sup>, Lylia Bey<sup>2</sup>, Abdullah Hilal<sup>1</sup>, Ekaterina V. Neborak<sup>2</sup>, Varvara G. Blinova<sup>1</sup>,  
Dmitry D. Zhdanov<sup>1,2,\*</sup>**

<sup>1</sup> Institute of Biomedical Chemistry, Pogodinskaya st. 10/8, Moscow, 119121, Russia;

leonova\_y@mail.ru (Y.A.G.); hilalabdullahh@gmail.com (A.H.); varya.blinova@list.ru (V.G.B.)

<sup>2</sup> Department of Biochemistry, Peoples' Friendship University of Russia (RUDN University),

Miklukho—Maklaya Street 6, Moscow, 117198, Russia; beylylia60@gmail.com (L.B.); neborak-ev@rudn.ru (E.V.N)

Correspondence: zhdanovdd@gmail.com

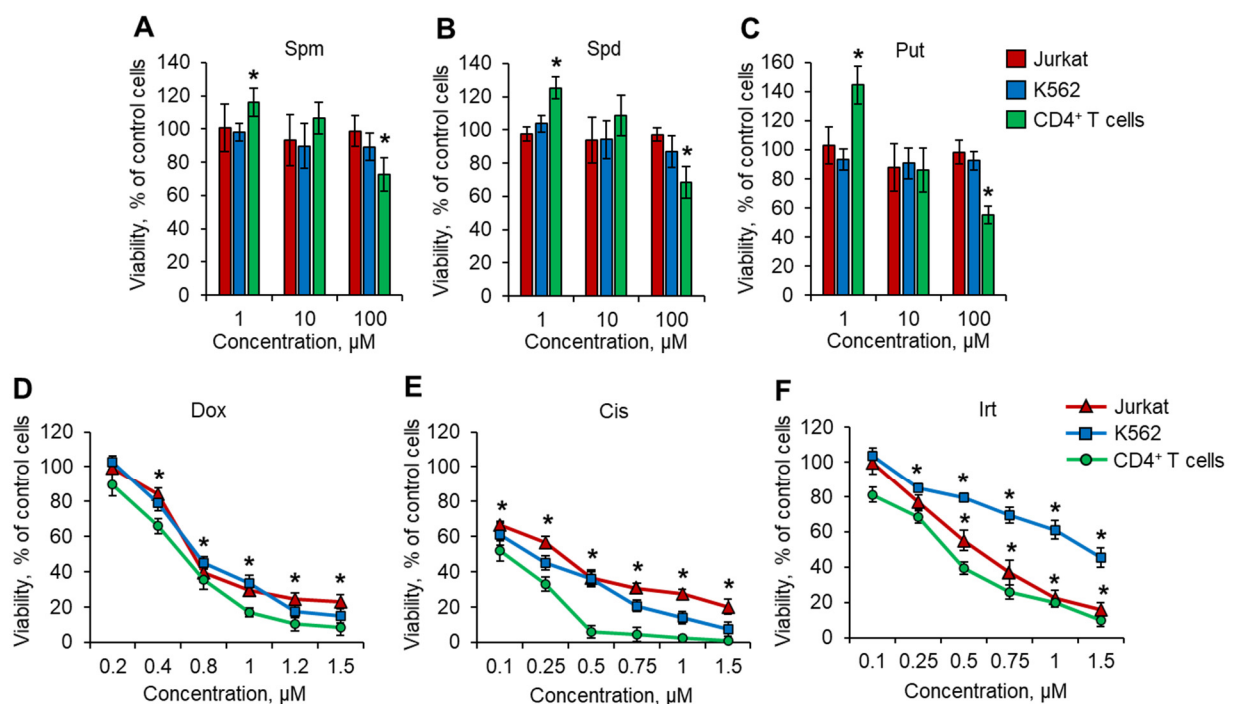

**Figure S1.** Results of the MTT test for cancer Jurkat and K562 cells and normal human CD4<sup>+</sup> T lymphocytes incubated with different concentrations of (A) spermine (Spm), (B) spermidine (Spd), (C) putrescine (Put), (D) doxorubicin (Dox), (E) cisplatin (Cis), or (F) irinotecan (Irt) for 48 h. N = 8. \* p ≤ 0.05 vs. control nontreated cells.

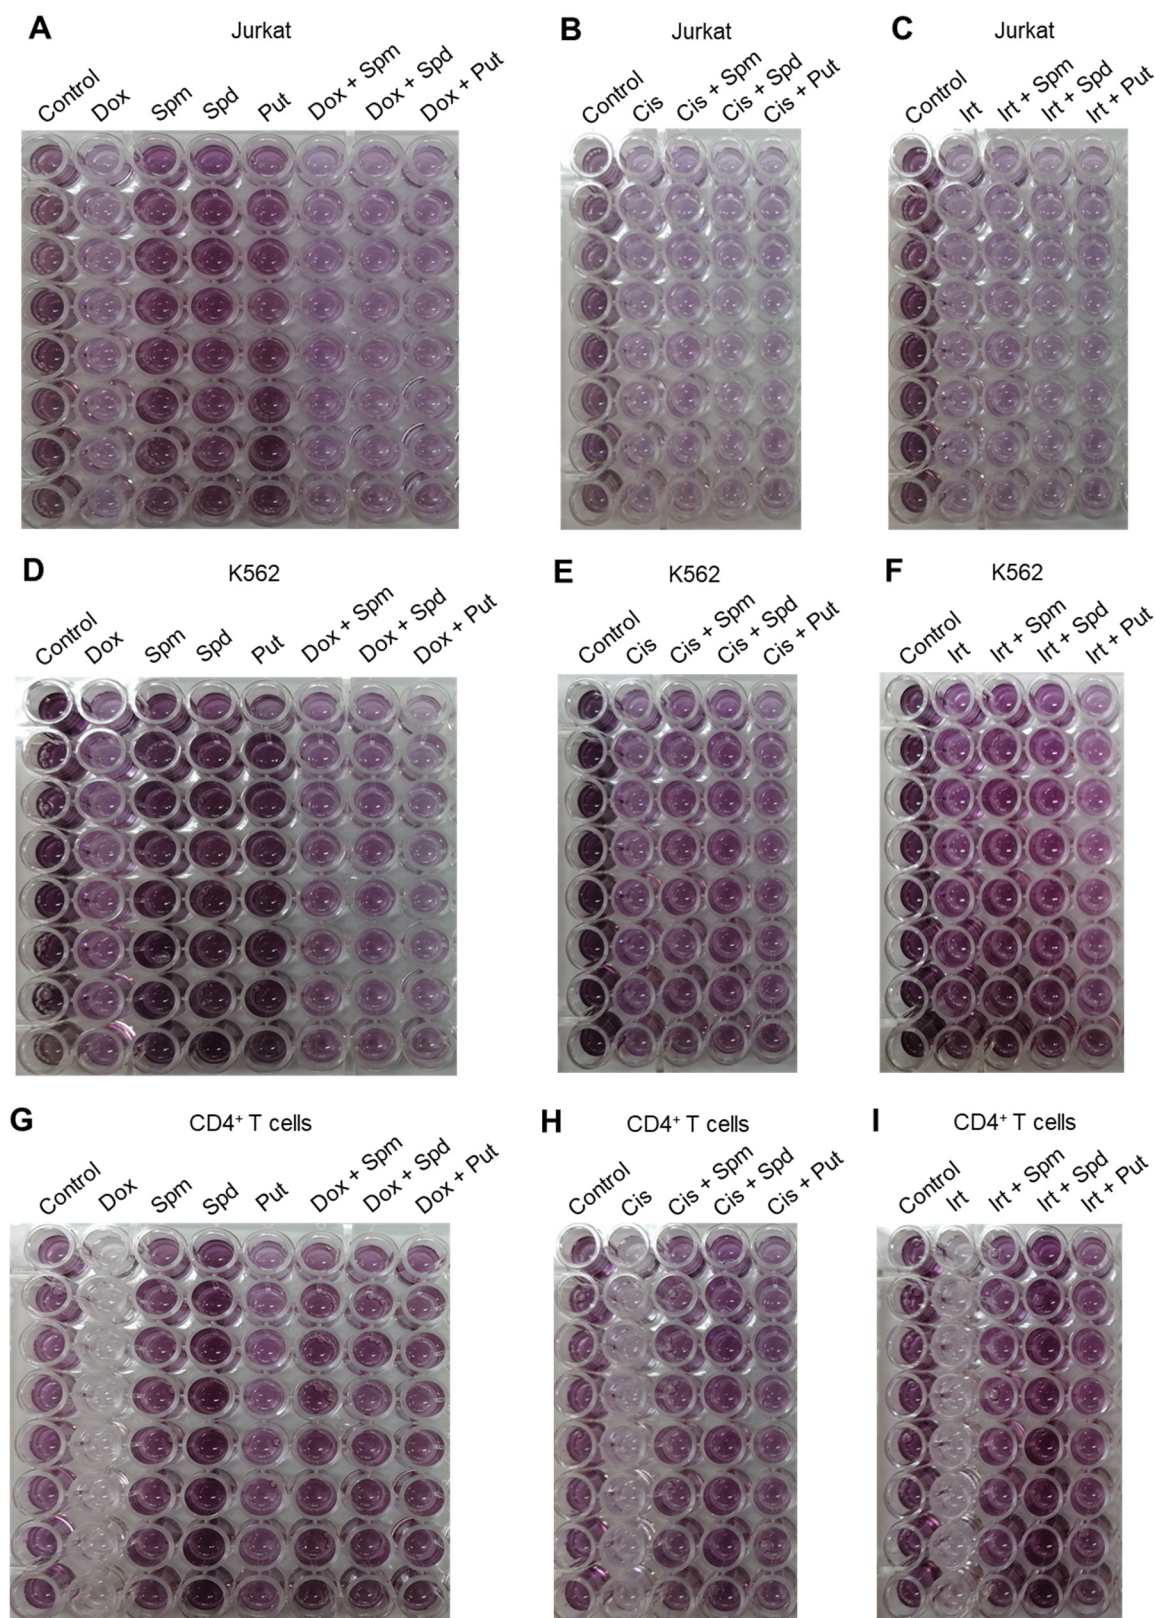

**Figure S2.** Representative photos of the MTT test for cells incubated with 10  $\mu$ M of each PA for 72 h. The results of the MTT test for cancer (A – C) Jurkat, (D – E) K562 or (G – I) normal CD4<sup>+</sup> T cells incubated with genotoxic agents: 1  $\mu$ M doxorubicin (Dox), 0.5  $\mu$ M cisplatin (Cis) or 1  $\mu$ M irinotecan (Irt) in the presence of 10  $\mu$ M or in the absence of each PA. Spd, spermidine; Spm, spermine; Put, putrescine.

**Table S1.** List of primers used for real-time RT-PCR.

| <b>Target</b>     | <b>Sense 5' – 3'</b>    | <b>Antisense 5' – 3'</b> | <b>Product size, bp.</b> | <b>Tann, °C</b> |
|-------------------|-------------------------|--------------------------|--------------------------|-----------------|
| RAD51A Total      | ggggcaagcgagtagagaag    | gctgcatctgcattgccatt     | 151                      | 60              |
| FL RAD51A         | ctacttcaaggtggaattgag   | ctgctacaccaaactcatcagc   | 454                      | 57              |
| RAD51A $\Delta$ 4 | gataaaattctggtggaattgag | ctgctacaccaaactcatcagc   | 456                      | 58              |
| RAD51A $\Delta$ 9 | gccatgatggtagaatctag    | ctcagatacaatctcatcagc    | 162                      | 60              |
| RAD51B            | gtgtggcttgtggatccctc    | ctgggaaaacgggattctgc     | 196                      | 61              |
| RAD51C            | cgctgtcgtgactacacaga    | ggctgatcattgctgggct      | 181                      | 61              |
| RAD51D            | tccagatgctggatgtgctg    | ctgctgacctccagaagtg      | 134                      | 62              |
| 18S               | ggatccattggagggcaagt    | acgagcttttaactgcagcaa    | 91                       | 62              |
